# Supplementary material for: A Bitter Taste Receptor as a Novel Molecular Target on Cancer-Associated Fibroblasts in Pancreatic Ductal Adenocarcinoma
Source: Pharmaceuticals (Basel). 2023 Mar 3;16(3):389. doi: 10.3390/ph16030389 (PMC10058050; doi:10.3390/ph16030389)
Supplement: Supplementary file 1 [file pharmaceuticals-16-00389-s001.zip › pharmaceuticals-2107205 Supplemental-Table S1.xlsx]

## Sheet: paad_tcga_pan_can_atlas_2018_cl
Study ID	Patient ID	Sample ID	Other Patient ID	American Joint Committee on Cancer Publication Version Type	American Joint Committee on Cancer Tumor Stage Code	American Joint Committee on Cancer Metastasis Stage Code	Neoplasm Disease Stage American Joint Committee on Cancer Code	Neoplasm Disease Lymph Node Stage American Joint Committee on Cancer Code	Cancer Type	TCGA PanCanAtlas Cancer Type Acronym	Cancer Type Detailed	Neoplasm Histologic Grade	International Classification of Diseases for Oncology, Third Edition ICD-O-3 Histology Code	International Classification of Diseases for Oncology, Third Edition ICD-O-3 Site Code	Oncotree Code	Sample Type	Subtype	Tumor Disease Anatomic Site	Tumor Type
paad_tcga_pan_can_atlas_2018	TCGA-2J-AAB1	TCGA-2J-AAB1-01	75119D1A-93E5-4AE7-9D60-69EE929A0772	7TH	T3	M0	STAGE IIB	N1	Pancreatic Cancer	PAAD	Pancreatic Adenocarcinoma	G3	8480/3	C25.0	PAAD	Primary	PAAD	Pancreas	Pancreas Adenocarcinoma, Other Subtype
paad_tcga_pan_can_atlas_2018	TCGA-2J-AAB4	TCGA-2J-AAB4-01	33833131-1482-42D5-9CF5-01CADE540234	7TH	T2	M0	STAGE IIB	N1	Pancreatic Cancer	PAAD	Pancreatic Adenocarcinoma	G2	8140/3	C25.8	PAAD	Primary	PAAD	Pancreas	Pancreas Adenocarcinoma, Other Subtype
paad_tcga_pan_can_atlas_2018	TCGA-2J-AAB6	TCGA-2J-AAB6-01	70797499-16E6-48CC-8AE4-1E692713DAD3	7TH	T3	M0	STAGE IIA	N0	Pancreatic Cancer	PAAD	Pancreatic Adenocarcinoma	G2	8500/3	C25.1	PAAD	Primary	PAAD	Pancreas	Pancreas Adenocarcinoma, Ductal Type
paad_tcga_pan_can_atlas_2018	TCGA-2J-AAB8	TCGA-2J-AAB8-01	2E8F90F4-AED3-43B0-985C-DFDC2581F24F	7TH	T3	M0	STAGE IIB	N1	Pancreatic Cancer	PAAD	Pancreatic Adenocarcinoma	G3	8500/3	C25.0	PAAD	Primary	PAAD	Pancreas	Pancreas Adenocarcinoma, Ductal Type
paad_tcga_pan_can_atlas_2018	TCGA-2J-AAB9	TCGA-2J-AAB9-01	A5748656-5330-417A-8938-01F69DDB3576	7TH	T3	M0	STAGE IIB	N1	Pancreatic Cancer	PAAD	Pancreatic Adenocarcinoma	G1	8500/3	C25.0	PAAD	Primary	PAAD	Pancreas	Pancreas Adenocarcinoma, Ductal Type
paad_tcga_pan_can_atlas_2018	TCGA-2J-AABA	TCGA-2J-AABA-01	E3A19E63-BAE5-498B-9687-41194AA5728D	7TH	T3	M0	STAGE IIB	N1	Pancreatic Cancer	PAAD	Pancreatic Adenocarcinoma	G2	8500/3	C25.0	PAAD	Primary	PAAD	Pancreas	Pancreas Adenocarcinoma, Ductal Type
paad_tcga_pan_can_atlas_2018	TCGA-2J-AABE	TCGA-2J-AABE-01	58C1C391-5EA3-4432-BB1E-E7E1974954BC	7TH	T3	M0	STAGE IIA	N0	Pancreatic Cancer	PAAD	Pancreatic Adenocarcinoma	G2	8500/3	C25.1	PAAD	Primary	PAAD	Pancreas	Pancreas Adenocarcinoma, Ductal Type
paad_tcga_pan_can_atlas_2018	TCGA-2J-AABF	TCGA-2J-AABF-01	886D6116-D496-444F-9B7B-7449DAD31055	7TH	T3	M0	STAGE IIB	N1	Pancreatic Cancer	PAAD	Pancreatic Adenocarcinoma	G3	8500/3	C25.0	PAAD	Primary	PAAD	Pancreas	Pancreas Adenocarcinoma, Ductal Type
paad_tcga_pan_can_atlas_2018	TCGA-2J-AABH	TCGA-2J-AABH-01	C53328B4-0930-4E6A-A648-283B5565295E	7TH	T3	M0	STAGE IIA	N0	Pancreatic Cancer	PAAD	Pancreatic Adenocarcinoma	G3	8140/3	C25.1	PAAD	Primary	PAAD	Pancreas	Pancreas Adenocarcinoma, Other Subtype
paad_tcga_pan_can_atlas_2018	TCGA-2J-AABI	TCGA-2J-AABI-01	2AAF212F-000A-4A9D-8A4A-198FA94F491E	7TH	T3	M0	STAGE IIA	N0	Pancreatic Cancer	PAAD	Pancreatic Adenocarcinoma	G3	8140/3	C25.0	PAAD	Primary	PAAD	Pancreas	Pancreas Adenocarcinoma, Other Subtype
paad_tcga_pan_can_atlas_2018	TCGA-2J-AABK	TCGA-2J-AABK-01	C24C54EA-4095-460D-BB53-E3629A56CD62	7TH	T3	M0	STAGE IIB	N1	Pancreatic Cancer	PAAD	Pancreatic Adenocarcinoma	G2	8500/3	C25.0	PAAD	Primary	PAAD	Pancreas	Pancreas Adenocarcinoma, Ductal Type
paad_tcga_pan_can_atlas_2018	TCGA-2J-AABO	TCGA-2J-AABO-01	A8C3E333-865D-4060-8CE4-453AA6F9F0E8	7TH	T3	M0	STAGE IIB	N1	Pancreatic Cancer	PAAD	Pancreatic Adenocarcinoma	G2	8500/3	C25.0	PAAD	Primary	PAAD	Pancreas	Pancreas Adenocarcinoma, Ductal Type
paad_tcga_pan_can_atlas_2018	TCGA-2J-AABR	TCGA-2J-AABR-01	507A4E05-D5AB-4DBB-9B4F-76B1A21B79DD	7TH	T3	M0	STAGE IIA	N0	Pancreatic Cancer	PAAD	Pancreatic Adenocarcinoma	G3	8500/3	C25.8	PAAD	Primary	PAAD	Pancreas	Pancreas Adenocarcinoma, Ductal Type
paad_tcga_pan_can_atlas_2018	TCGA-2J-AABT	TCGA-2J-AABT-01	3F9CC59E-9F7D-40D1-9365-28B40DFF3C59	7TH	T3	M0	STAGE IIB	N1	Pancreatic Cancer	PAAD	Pancreatic Adenocarcinoma	G2	8500/3	C25.0	PAAD	Primary	PAAD	Pancreas	Pancreas Adenocarcinoma, Ductal Type
paad_tcga_pan_can_atlas_2018	TCGA-2J-AABU	TCGA-2J-AABU-01	0B4B50C7-AA0B-4A64-807B-D3CB47EEEB6F	7TH	T3	M0	STAGE IIB	N1	Pancreatic Cancer	PAAD	Pancreatic Adenocarcinoma	G3	8500/3	C25.0	PAAD	Primary	PAAD	Pancreas	Pancreas Adenocarcinoma, Ductal Type
paad_tcga_pan_can_atlas_2018	TCGA-2J-AABV	TCGA-2J-AABV-01	232073A1-2BF3-4539-A396-BDE7836F9AEB	7TH	T3	M0	STAGE IIB	N1	Pancreatic Cancer	PAAD	Pancreatic Adenocarcinoma	G4	8500/3	C25.0	PAAD	Primary	PAAD	Pancreas	Pancreas Adenocarcinoma, Ductal Type
paad_tcga_pan_can_atlas_2018	TCGA-2L-AAQA	TCGA-2L-AAQA-01	D8AA891C-8050-471E-AD3E-32B9C5E9DB03	7TH	T3	MX	STAGE IIB	N1	Pancreatic Cancer	PAAD	Pancreatic Adenocarcinoma	G2	8500/3	C25.9	PAAD	Primary	PAAD	Pancreas	Pancreas Adenocarcinoma, Ductal Type
paad_tcga_pan_can_atlas_2018	TCGA-2L-AAQE	TCGA-2L-AAQE-01	8E7D5615-5142-4D53-A460-2CAFADE1F690	7TH	T3	M0	STAGE IIB	N1	Pancreatic Cancer	PAAD	Pancreatic Adenocarcinoma	G2	8500/3	C25.0	PAAD	Primary	PAAD	Pancreas	Pancreas Adenocarcinoma, Ductal Type
paad_tcga_pan_can_atlas_2018	TCGA-2L-AAQI	TCGA-2L-AAQI-01	A28CFA95-5A99-40F3-928E-7A94F2492D2C	7TH	T3	MX	STAGE IIB	N1	Pancreatic Cancer	PAAD	Pancreatic Adenocarcinoma	G3	8500/3	C25.0	PAAD	Primary	PAAD	Pancreas	Pancreas Adenocarcinoma, Ductal Type
paad_tcga_pan_can_atlas_2018	TCGA-2L-AAQJ	TCGA-2L-AAQJ-01	F96AB3FE-BB11-4585-A35E-52D400E55AB7	7TH	T4	MX	STAGE III	N0	Pancreatic Cancer	PAAD	Pancreatic Adenocarcinoma	G2	8500/3	C25.0	PAAD	Primary	PAAD	Pancreas	Pancreas Adenocarcinoma, Ductal Type
paad_tcga_pan_can_atlas_2018	TCGA-2L-AAQL	TCGA-2L-AAQL-01	1DB061C0-9B28-4BF9-8AD2-0383C69B6800	7TH	T3	MX	STAGE IIB	N1	Pancreatic Cancer	PAAD	Pancreatic Adenocarcinoma	G3	8500/3	C25.0	PAAD	Primary	PAAD	Pancreas	Pancreas Adenocarcinoma, Ductal Type
paad_tcga_pan_can_atlas_2018	TCGA-3A-A9I5	TCGA-3A-A9I5-01	9924E309-5C47-42FE-B937-547F2B3D6842	6TH	NA	MX	NA	N0	Pancreatic Cancer	PAAD	Pancreatic Adenocarcinoma	G1	8500/3	C25.0	PAAD	Primary	PAAD	Pancreas	Pancreas Adenocarcinoma, Ductal Type
paad_tcga_pan_can_atlas_2018	TCGA-3A-A9I7	TCGA-3A-A9I7-01	556BACA9-03D6-48A3-9216-4FC441E99F90	7TH	T3	MX	STAGE IIB	N1	Pancreatic Cancer	PAAD	Pancreatic Adenocarcinoma	G2	8500/3	C25.0	PAAD	Primary	PAAD	Pancreas	Pancreas Adenocarcinoma, Ductal Type
paad_tcga_pan_can_atlas_2018	TCGA-3A-A9I9	TCGA-3A-A9I9-01	396FF766-A383-4F42-BCE3-F2F32B7F1151	7TH	T3	MX	STAGE IIA	N0	Pancreatic Cancer	PAAD	Pancreatic Adenocarcinoma	G2	8500/3	C25.0	PAAD	Primary	PAAD	Pancreas	Pancreas Adenocarcinoma, Ductal Type
paad_tcga_pan_can_atlas_2018	TCGA-3A-A9IB	TCGA-3A-A9IB-01	3CBF56E6-DCCC-40FE-B06E-2621A2121E9D	7TH	T3	MX	STAGE IIB	N1	Pancreatic Cancer	PAAD	Pancreatic Adenocarcinoma	G3	8500/3	C25.0	PAAD	Primary	PAAD	Pancreas	Pancreas Adenocarcinoma, Ductal Type
paad_tcga_pan_can_atlas_2018	TCGA-3A-A9IC	TCGA-3A-A9IC-01	67E9ABC1-4B6F-4054-BDC4-29906C55C682	7TH	T3	MX	STAGE IIB	N1	Pancreatic Cancer	PAAD	Pancreatic Adenocarcinoma	G2	8500/3	C25.0	PAAD	Primary	PAAD	Pancreas	Pancreas Adenocarcinoma, Ductal Type
paad_tcga_pan_can_atlas_2018	TCGA-3A-A9IH	TCGA-3A-A9IH-01	10F0D40B-C4C4-441B-9CFB-BEF5E44AA91E	7TH	T1	MX	STAGE IA	N0	Pancreatic Cancer	PAAD	Pancreatic Adenocarcinoma	G2	8500/3	C25.1	PAAD	Primary	PAAD	Pancreas	Pancreas Adenocarcinoma, Ductal Type
paad_tcga_pan_can_atlas_2018	TCGA-3A-A9IU	TCGA-3A-A9IU-01	CD9DC5C5-1161-43EA-A617-1356A3B23E16	7TH	T3	MX	STAGE IIB	N1	Pancreatic Cancer	PAAD	Pancreatic Adenocarcinoma	G3	8500/3	C25.0	PAAD	Primary	PAAD	Pancreas	Pancreas Adenocarcinoma, Ductal Type
paad_tcga_pan_can_atlas_2018	TCGA-3A-A9IX	TCGA-3A-A9IX-01	959E1F13-360E-4E12-ADD5-BF9A376990D2	7TH	T1	MX	STAGE IA	N0	Pancreatic Cancer	PAAD	Pancreatic Adenocarcinoma	G2	8500/3	C25.0	PAAD	Primary	PAAD	Pancreas	Pancreas Adenocarcinoma, Ductal Type
paad_tcga_pan_can_atlas_2018	TCGA-3A-A9IZ	TCGA-3A-A9IZ-01	517E0F20-56CC-470E-8C5F-543EFA10CFB5	7TH	T3	MX	STAGE IIB	N1	Pancreatic Cancer	PAAD	Pancreatic Adenocarcinoma	G2	8500/3	C25.0	PAAD	Primary	PAAD	Pancreas	Pancreas Adenocarcinoma, Ductal Type
paad_tcga_pan_can_atlas_2018	TCGA-3A-A9J0	TCGA-3A-A9J0-01	A308A5EE-8EA1-47EE-823D-14736D74A925	7TH	T3	MX	STAGE IIB	N1	Pancreatic Cancer	PAAD	Pancreatic Adenocarcinoma	G2	8500/3	C25.0	PAAD	Primary	PAAD	Pancreas	Pancreas Adenocarcinoma, Ductal Type
paad_tcga_pan_can_atlas_2018	TCGA-3E-AAAY	TCGA-3E-AAAY-01	A643D0B8-AA50-481C-9F12-F2E634D61D90	6TH	T3	MX	STAGE IIB	N1	Pancreatic Cancer	PAAD	Pancreatic Adenocarcinoma	G3	8500/3	C25.1	PAAD	Primary	PAAD	Pancreas	Pancreas Adenocarcinoma, Ductal Type
paad_tcga_pan_can_atlas_2018	TCGA-3E-AAAZ	TCGA-3E-AAAZ-01	9D449AA3-B740-4D5A-9AEA-880B6F84CFF4	6TH	T3	MX	STAGE IIA	N0	Pancreatic Cancer	PAAD	Pancreatic Adenocarcinoma	G2	8500/3	C25.0	PAAD	Primary	PAAD	Pancreas	Pancreas Adenocarcinoma, Ductal Type
paad_tcga_pan_can_atlas_2018	TCGA-F2-6879	TCGA-F2-6879-01	8d9bd437-8b4b-4da5-87ba-6b5790f05022	6TH	T3	M0	STAGE IIB	N1	Pancreatic Cancer	PAAD	Pancreatic Adenocarcinoma	G2	8140/3	C25.0	PAAD	Primary	PAAD	Pancreas	Pancreas Adenocarcinoma, Other Subtype
paad_tcga_pan_can_atlas_2018	TCGA-F2-A44G	TCGA-F2-A44G-01	20094E3E-CEE3-41DD-8553-1FC393117786	7TH	T3	M0	STAGE IIB	N1	Pancreatic Cancer	PAAD	Pancreatic Adenocarcinoma	G2	8140/3	C25.0	PAAD	Primary	PAAD	Pancreas	Pancreas Adenocarcinoma, Ductal Type
paad_tcga_pan_can_atlas_2018	TCGA-F2-A44H	TCGA-F2-A44H-01	570F9947-1CE5-49C7-9619-49439DF6C7A9	7TH	T3	M0	STAGE IIA	N0	Pancreatic Cancer	PAAD	Pancreatic Adenocarcinoma	G2	8140/3	C25.0	PAAD	Primary	PAAD	Pancreas	Pancreas Adenocarcinoma, Ductal Type
paad_tcga_pan_can_atlas_2018	TCGA-F2-A7TX	TCGA-F2-A7TX-01	1F5494C4-E26C-4512-96D9-30412B5B32CE	7TH	T3	M0	STAGE IIB	N1	Pancreatic Cancer	PAAD	Pancreatic Adenocarcinoma	G3	8500/3	C25.0	PAAD	Primary	PAAD	Pancreas	Pancreas Adenocarcinoma, Ductal Type
paad_tcga_pan_can_atlas_2018	TCGA-F2-A8YN	TCGA-F2-A8YN-01	5DBB4642-6636-4D67-9E73-25C7312AEC44	7TH	T3	M0	STAGE IIA	N0	Pancreatic Cancer	PAAD	Pancreatic Adenocarcinoma	G2	8500/3	C25.0	PAAD	Primary	PAAD	Pancreas	Pancreas Adenocarcinoma, Ductal Type
paad_tcga_pan_can_atlas_2018	TCGA-FB-A4P5	TCGA-FB-A4P5-01	B2E29F26-29AF-4E2D-84DD-C513B4A07C70	7TH	T3	MX	STAGE IIB	N1	Pancreatic Cancer	PAAD	Pancreatic Adenocarcinoma	G2	8500/3	C25.0	PAAD	Primary	PAAD	Pancreas	Pancreas Adenocarcinoma, Ductal Type
paad_tcga_pan_can_atlas_2018	TCGA-FB-A4P6	TCGA-FB-A4P6-01	9246C642-3231-4137-A24B-3EFAE151B655	7TH	T3	MX	STAGE IIB	N1	Pancreatic Cancer	PAAD	Pancreatic Adenocarcinoma	G1	8500/3	C25.0	PAAD	Primary	NA	Pancreas	Pancreas Adenocarcinoma, Ductal Type
paad_tcga_pan_can_atlas_2018	TCGA-FB-A545	TCGA-FB-A545-01	B0CB81AD-3C20-4D56-AB7D-F64C0CAEE1CE	7TH	T3	M0	STAGE IIB	N1	Pancreatic Cancer	PAAD	Pancreatic Adenocarcinoma	G2	8500/3	C25.1	PAAD	Primary	PAAD	Pancreas	Pancreas Adenocarcinoma, Ductal Type
paad_tcga_pan_can_atlas_2018	TCGA-FB-A5VM	TCGA-FB-A5VM-01	40D9B9F7-42B7-4CFD-AF95-660777AD0529	7TH	T2	M0	STAGE IB	N0	Pancreatic Cancer	PAAD	Pancreatic Adenocarcinoma	G3	8500/3	C25.0	PAAD	Primary	PAAD	Pancreas	Pancreas Adenocarcinoma, Ductal Type
paad_tcga_pan_can_atlas_2018	TCGA-FB-A78T	TCGA-FB-A78T-01	2AD10199-1381-42B7-B54F-DA34C1B1D3C0	7TH	T3	M0	STAGE IIB	N1	Pancreatic Cancer	PAAD	Pancreatic Adenocarcinoma	G2	8500/3	C25.0	PAAD	Primary	PAAD	Pancreas	Pancreas Adenocarcinoma, Ductal Type
paad_tcga_pan_can_atlas_2018	TCGA-FB-AAPQ	TCGA-FB-AAPQ-01	ECDD0E44-0ADD-4A08-A3F8-AB2F51DF7AFD	7TH	T3	MX	STAGE IIB	N1	Pancreatic Cancer	PAAD	Pancreatic Adenocarcinoma	G2	8500/3	C25.0	PAAD	Primary	PAAD	Pancreas	Pancreas Adenocarcinoma, Ductal Type
paad_tcga_pan_can_atlas_2018	TCGA-FB-AAPS	TCGA-FB-AAPS-01	2048D0F9-ED9F-46DF-BCD4-3DFD9137670F	7TH	T2	MX	STAGE IIB	N1	Pancreatic Cancer	PAAD	Pancreatic Adenocarcinoma	G2	8500/3	C25.0	PAAD	Primary	PAAD	Pancreas	Pancreas Adenocarcinoma, Ductal Type
paad_tcga_pan_can_atlas_2018	TCGA-FB-AAPU	TCGA-FB-AAPU-01	712335E1-F1E9-44B9-957C-497EA5E8FA2F	7TH	T3	MX	STAGE IIA	N0	Pancreatic Cancer	PAAD	Pancreatic Adenocarcinoma	G2	8500/3	C25.0	PAAD	Primary	PAAD	Pancreas	Pancreas Adenocarcinoma, Ductal Type
paad_tcga_pan_can_atlas_2018	TCGA-FB-AAPY	TCGA-FB-AAPY-01	953359DA-E535-48E6-97DC-1B4CCAD6A671	7TH	T2	MX	STAGE IIB	N1	Pancreatic Cancer	PAAD	Pancreatic Adenocarcinoma	G2	8500/3	C25.0	PAAD	Primary	PAAD	Pancreas	Pancreas Adenocarcinoma, Ductal Type
paad_tcga_pan_can_atlas_2018	TCGA-FB-AAPZ	TCGA-FB-AAPZ-01	F2313562-C894-486D-A9B6-ED362E12A32A	7TH	T2	MX	STAGE IIB	N1	Pancreatic Cancer	PAAD	Pancreatic Adenocarcinoma	G3	8500/3	C25.0	PAAD	Primary	PAAD	Pancreas	Pancreas Adenocarcinoma, Ductal Type
paad_tcga_pan_can_atlas_2018	TCGA-FB-AAQ0	TCGA-FB-AAQ0-01	81B6B844-D760-4146-9B01-1C4B2596EB77	7TH	T3	MX	STAGE IIA	N0	Pancreatic Cancer	PAAD	Pancreatic Adenocarcinoma	G3	8500/3	C25.0	PAAD	Primary	PAAD	Pancreas	Pancreas Adenocarcinoma, Ductal Type
paad_tcga_pan_can_atlas_2018	TCGA-FB-AAQ1	TCGA-FB-AAQ1-01	FF8DAC97-42FF-4F48-81C4-50315AD8DE58	7TH	T3	MX	STAGE IIB	N1	Pancreatic Cancer	PAAD	Pancreatic Adenocarcinoma	G2	8500/3	C25.0	PAAD	Primary	PAAD	Pancreas	Pancreas Adenocarcinoma, Ductal Type
paad_tcga_pan_can_atlas_2018	TCGA-FB-AAQ2	TCGA-FB-AAQ2-01	F5558DC7-5BEF-426F-A6BF-B704FD5DBDA0	7TH	T3	MX	STAGE IIB	N1	Pancreatic Cancer	PAAD	Pancreatic Adenocarcinoma	G3	8500/3	C25.0	PAAD	Primary	PAAD	Pancreas	Pancreas Adenocarcinoma, Ductal Type
paad_tcga_pan_can_atlas_2018	TCGA-FB-AAQ3	TCGA-FB-AAQ3-01	5965CD7B-F384-4473-826A-8381E362D10E	7TH	T3	MX	STAGE IIB	N1	Pancreatic Cancer	PAAD	Pancreatic Adenocarcinoma	G2	8500/3	C25.0	PAAD	Primary	PAAD	Pancreas	Pancreas Adenocarcinoma, Ductal Type
paad_tcga_pan_can_atlas_2018	TCGA-FB-AAQ6	TCGA-FB-AAQ6-01	8475C44D-E091-4C65-B1B4-9A77AE3C0E1D	7TH	T1	MX	STAGE IA	N0	Pancreatic Cancer	PAAD	Pancreatic Adenocarcinoma	G2	8500/3	C25.2	PAAD	Primary	PAAD	Pancreas	Pancreas Adenocarcinoma, Ductal Type
paad_tcga_pan_can_atlas_2018	TCGA-H6-8124	TCGA-H6-8124-01	7e4e5633-6f83-4b46-b6eb-64b3f2866ba3	7TH	T3	M0	STAGE IIB	N1	Pancreatic Cancer	PAAD	Pancreatic Adenocarcinoma	G3	8140/3	C25.0	PAAD	Primary	PAAD	Pancreas	Pancreas Adenocarcinoma, Ductal Type
paad_tcga_pan_can_atlas_2018	TCGA-H6-A45N	TCGA-H6-A45N-01	758B70F6-8064-4F43-AABE-E5F968FE2955	7TH	T3	MX	STAGE IIB	N1	Pancreatic Cancer	PAAD	Pancreatic Adenocarcinoma	G3	8140/3	C25.2	PAAD	Primary	PAAD	Pancreas	Pancreas Adenocarcinoma, Other Subtype
paad_tcga_pan_can_atlas_2018	TCGA-HV-A5A3	TCGA-HV-A5A3-01	D4F66F06-9289-45C1-B9EB-AAEF991A4BB6	7TH	T3	MX	STAGE IIA	NX	Pancreatic Cancer	PAAD	Pancreatic Adenocarcinoma	G2	8500/3	C25.1	PAAD	Primary	PAAD	Pancreas	Pancreas Adenocarcinoma, Ductal Type
paad_tcga_pan_can_atlas_2018	TCGA-HV-A5A4	TCGA-HV-A5A4-01	3264459C-ADEB-486E-AB8F-274574441593	7TH	T3	MX	STAGE IIA	N0	Pancreatic Cancer	PAAD	Pancreatic Adenocarcinoma	G2	8500/3	C25.2	PAAD	Primary	PAAD	Pancreas	Pancreas Adenocarcinoma, Ductal Type
paad_tcga_pan_can_atlas_2018	TCGA-HV-A5A5	TCGA-HV-A5A5-01	1B31D2E9-5B05-4FFF-88D6-3A95BF8F8D43	7TH	T3	M0	STAGE IIB	N1	Pancreatic Cancer	PAAD	Pancreatic Adenocarcinoma	G2	8500/3	C25.0	PAAD	Primary	PAAD	Pancreas	Pancreas Adenocarcinoma, Ductal Type
paad_tcga_pan_can_atlas_2018	TCGA-HV-A5A6	TCGA-HV-A5A6-01	40FC7973-91C4-4FA8-A105-7FC3D6F3817C	7TH	T3	M0	STAGE IIB	N1B	Pancreatic Cancer	PAAD	Pancreatic Adenocarcinoma	G1	8500/3	C25.0	PAAD	Primary	PAAD	Pancreas	Pancreas Adenocarcinoma, Ductal Type
paad_tcga_pan_can_atlas_2018	TCGA-HV-A7OL	TCGA-HV-A7OL-01	2E0701E1-E16F-457F-B939-7B1128F4A58B	7TH	T3	MX	STAGE IIA	N0	Pancreatic Cancer	PAAD	Pancreatic Adenocarcinoma	G2	8500/3	C25.0	PAAD	Primary	PAAD	Pancreas	Pancreas Adenocarcinoma, Ductal Type
paad_tcga_pan_can_atlas_2018	TCGA-HV-AA8V	TCGA-HV-AA8V-01	0FA89FBC-307A-48D5-ADCE-192556755C22	7TH	T3	MX	STAGE IIB	N1	Pancreatic Cancer	PAAD	Pancreatic Adenocarcinoma	G3	8500/3	C25.0	PAAD	Primary	PAAD	Pancreas	Pancreas Adenocarcinoma, Ductal Type
paad_tcga_pan_can_atlas_2018	TCGA-HV-AA8X	TCGA-HV-AA8X-01	16B38977-AEA1-4C75-89EC-4FB551F652DD	7TH	T2	MX	STAGE IIB	N1	Pancreatic Cancer	PAAD	Pancreatic Adenocarcinoma	G2	8500/3	C25.1	PAAD	Primary	PAAD	Pancreas	Pancreas Adenocarcinoma, Ductal Type
paad_tcga_pan_can_atlas_2018	TCGA-HZ-7919	TCGA-HZ-7919-01	2faea98a-edf7-4e92-bfb7-f91a36259872	7TH	T3	M0	STAGE IIB	N1	Pancreatic Cancer	PAAD	Pancreatic Adenocarcinoma	G2	8500/3	C25.0	PAAD	Primary	PAAD	Pancreas	Pancreas Adenocarcinoma, Ductal Type
paad_tcga_pan_can_atlas_2018	TCGA-HZ-7922	TCGA-HZ-7922-01	6f777943-ffcb-46d9-872d-514559dee00d	7TH	T3	MX	STAGE IIB	N1	Pancreatic Cancer	PAAD	Pancreatic Adenocarcinoma	G1	8500/3	C25.0	PAAD	Primary	PAAD	Pancreas	Pancreas Adenocarcinoma, Ductal Type
paad_tcga_pan_can_atlas_2018	TCGA-HZ-7925	TCGA-HZ-7925-01	f91eb33d-76f0-418c-9962-11a5b31ca1dc	7TH	T3	MX	STAGE IIB	N1	Pancreatic Cancer	PAAD	Pancreatic Adenocarcinoma	G2	8500/3	C25.0	PAAD	Primary	PAAD	Pancreas	Pancreas Adenocarcinoma, Ductal Type
paad_tcga_pan_can_atlas_2018	TCGA-HZ-7926	TCGA-HZ-7926-01	2be42cc2-9b97-4821-afc2-d1e42eb3932d	7TH	T3	MX	STAGE IIB	N1	Pancreatic Cancer	PAAD	Pancreatic Adenocarcinoma	G1	8500/3	C25.0	PAAD	Primary	PAAD	Pancreas	Pancreas Adenocarcinoma, Ductal Type
paad_tcga_pan_can_atlas_2018	TCGA-HZ-8001	TCGA-HZ-8001-01	55cee1dd-15a0-4717-a281-63e08e2cfdf9	7TH	T4	MX	STAGE III	N0	Pancreatic Cancer	PAAD	Pancreatic Adenocarcinoma	G2	8500/3	C25.0	PAAD	Primary	PAAD	Pancreas	Pancreas Adenocarcinoma, Ductal Type
paad_tcga_pan_can_atlas_2018	TCGA-HZ-8002	TCGA-HZ-8002-01	4b37b026-1d41-4bad-8996-7cb1f0e569af	7TH	T3	MX	STAGE IIB	N1	Pancreatic Cancer	PAAD	Pancreatic Adenocarcinoma	G2	8500/3	C25.0	PAAD	Primary	PAAD	Pancreas	Pancreas Adenocarcinoma, Ductal Type
paad_tcga_pan_can_atlas_2018	TCGA-HZ-8003	TCGA-HZ-8003-01	68c0bc1b-3195-4ed6-8345-3ca53dfc54fc	7TH	T3	MX	STAGE IIB	N1	Pancreatic Cancer	PAAD	Pancreatic Adenocarcinoma	G2	8500/3	C25.0	PAAD	Primary	PAAD	Pancreas	Pancreas Adenocarcinoma, Ductal Type
paad_tcga_pan_can_atlas_2018	TCGA-HZ-8005	TCGA-HZ-8005-01	21814c02-6aa5-4b98-8fd8-41ca0b04ccd2	7TH	T3	MX	STAGE IIB	N1	Pancreatic Cancer	PAAD	Pancreatic Adenocarcinoma	G3	8500/3	C25.9	PAAD	Primary	PAAD	Pancreas	Pancreas Adenocarcinoma, Ductal Type
paad_tcga_pan_can_atlas_2018	TCGA-HZ-8315	TCGA-HZ-8315-01	02dbd5fa-e31f-4486-8df8-5b851f2e92bd	7TH	T3	MX	STAGE IIA	N0	Pancreatic Cancer	PAAD	Pancreatic Adenocarcinoma	G2	8500/3	C25.0	PAAD	Primary	PAAD	Pancreas	Pancreas Adenocarcinoma, Ductal Type
paad_tcga_pan_can_atlas_2018	TCGA-HZ-8317	TCGA-HZ-8317-01	a2fd0991-cfbd-4162-8ca9-2ed096f54a14	7TH	T3	MX	STAGE IIB	N1	Pancreatic Cancer	PAAD	Pancreatic Adenocarcinoma	G1	8500/3	C25.0	PAAD	Primary	PAAD	Pancreas	Pancreas Adenocarcinoma, Ductal Type
paad_tcga_pan_can_atlas_2018	TCGA-HZ-8519	TCGA-HZ-8519-01	70c2c861-01de-47bc-abfd-b7d14d68e1a1	7TH	T1	MX	STAGE IA	N0	Pancreatic Cancer	PAAD	Pancreatic Adenocarcinoma	G3	8140/3	C25.0	PAAD	Primary	NA	Pancreas	Pancreas Adenocarcinoma, Other Subtype
paad_tcga_pan_can_atlas_2018	TCGA-HZ-8636	TCGA-HZ-8636-01	02ef2e1a-5afe-4c00-a3ea-7f4a153f1da4	7TH	T3	M1	STAGE IV	N0	Pancreatic Cancer	PAAD	Pancreatic Adenocarcinoma	G3	8500/3	C25.2	PAAD	Primary	PAAD	Pancreas	Pancreas Adenocarcinoma, Ductal Type
paad_tcga_pan_can_atlas_2018	TCGA-HZ-8637	TCGA-HZ-8637-01	459028fd-0cd8-4e6d-a668-71fd60bd0a37	7TH	T3	MX	STAGE IIB	N1	Pancreatic Cancer	PAAD	Pancreatic Adenocarcinoma	G3	8500/3	C25.0	PAAD	Primary	PAAD	Pancreas	Pancreas Adenocarcinoma, Ductal Type
paad_tcga_pan_can_atlas_2018	TCGA-HZ-A49G	TCGA-HZ-A49G-01	47CB93BC-8F6B-4B2A-804C-BB4FC78DF9E1	7TH	T2	MX	STAGE IIB	N1	Pancreatic Cancer	PAAD	Pancreatic Adenocarcinoma	G2	8500/3	C25.0	PAAD	Primary	PAAD	Pancreas	Pancreas Adenocarcinoma, Ductal Type
paad_tcga_pan_can_atlas_2018	TCGA-HZ-A49H	TCGA-HZ-A49H-01	17142718-742E-464A-8E0F-A6B9AC8FAD75	7TH	T3	MX	STAGE IIB	N1	Pancreatic Cancer	PAAD	Pancreatic Adenocarcinoma	G2	8500/3	C25.0	PAAD	Primary	PAAD	Pancreas	Pancreas Adenocarcinoma, Ductal Type
paad_tcga_pan_can_atlas_2018	TCGA-HZ-A49I	TCGA-HZ-A49I-01	27286A38-1035-4A22-9EBC-874DF8C49026	7TH	T3	MX	STAGE IIB	N1	Pancreatic Cancer	PAAD	Pancreatic Adenocarcinoma	G2	8500/3	C25.0	PAAD	Primary	PAAD	Pancreas	Pancreas Adenocarcinoma, Ductal Type
paad_tcga_pan_can_atlas_2018	TCGA-HZ-A4BH	TCGA-HZ-A4BH-01	2C636FB4-C341-4C55-B920-27BC2D40C815	7TH	T3	MX	STAGE IIB	N1B	Pancreatic Cancer	PAAD	Pancreatic Adenocarcinoma	G3	8500/3	C25.0	PAAD	Primary	PAAD	Pancreas	Pancreas Adenocarcinoma, Ductal Type
paad_tcga_pan_can_atlas_2018	TCGA-HZ-A4BK	TCGA-HZ-A4BK-01	514D12B0-6F60-406E-BDE9-A090E918EBFF	7TH	T3	MX	STAGE IIB	N1	Pancreatic Cancer	PAAD	Pancreatic Adenocarcinoma	G3	8140/3	C25.0	PAAD	Primary	PAAD	Pancreas	Pancreas Adenocarcinoma, Other Subtype
paad_tcga_pan_can_atlas_2018	TCGA-HZ-A77O	TCGA-HZ-A77O-01	FE01A390-F45E-4352-A253-AF8EF7EE9628	7TH	T2	MX	STAGE IIB	N1	Pancreatic Cancer	PAAD	Pancreatic Adenocarcinoma	G2	8500/3	C25.0	PAAD	Primary	PAAD	Pancreas	Pancreas Adenocarcinoma, Ductal Type
paad_tcga_pan_can_atlas_2018	TCGA-HZ-A77P	TCGA-HZ-A77P-01	5971A597-1E16-4F6D-8D7B-0E69C6BDCEAD	7TH	T3	MX	STAGE IIB	N1	Pancreatic Cancer	PAAD	Pancreatic Adenocarcinoma	G1	8140/3	C25.0	PAAD	Primary	PAAD	Pancreas	Pancreas Adenocarcinoma, Other Subtype
paad_tcga_pan_can_atlas_2018	TCGA-HZ-A77Q	TCGA-HZ-A77Q-01	CE9E0431-19A1-4EA9-85B0-44A9E9792E03	7TH	T3	MX	STAGE IIB	N1	Pancreatic Cancer	PAAD	Pancreatic Adenocarcinoma	G2	8140/3	C25.0	PAAD	Primary	PAAD	Pancreas	Pancreas Adenocarcinoma, Other Subtype
paad_tcga_pan_can_atlas_2018	TCGA-HZ-A8P0	TCGA-HZ-A8P0-01	98F1D0EB-0977-4F53-A3B1-E6875A34C27B	7TH	T3	MX	STAGE IIB	N1	Pancreatic Cancer	PAAD	Pancreatic Adenocarcinoma	G1	8500/3	C25.0	PAAD	Primary	PAAD	Pancreas	Pancreas Adenocarcinoma, Ductal Type
paad_tcga_pan_can_atlas_2018	TCGA-HZ-A8P1	TCGA-HZ-A8P1-01	B8E0F4FB-C916-43B8-AFD2-8077A7E3AEBC	7TH	T2	MX	STAGE IB	N0	Pancreatic Cancer	PAAD	Pancreatic Adenocarcinoma	G1	8500/3	C25.2	PAAD	Primary	PAAD	Pancreas	Pancreas Adenocarcinoma, Ductal Type
paad_tcga_pan_can_atlas_2018	TCGA-HZ-A9TJ	TCGA-HZ-A9TJ-01	94CD2278-7C76-423B-A44B-564776211A07	7TH	T3	M1	STAGE IV	N0	Pancreatic Cancer	PAAD	Pancreatic Adenocarcinoma	G2	8140/3	C25.2	PAAD	Primary	PAAD	Pancreas	Pancreas Adenocarcinoma, Other Subtype
paad_tcga_pan_can_atlas_2018	TCGA-IB-7644	TCGA-IB-7644-01	1782bf45-7350-4053-8dd1-45faf4ed8dd9	7TH	T3	M1	STAGE IV	N1	Pancreatic Cancer	PAAD	Pancreatic Adenocarcinoma	G2	8500/3	C25.0	PAAD	Primary	PAAD	Pancreas	Pancreas Adenocarcinoma, Ductal Type
paad_tcga_pan_can_atlas_2018	TCGA-IB-7645	TCGA-IB-7645-01	7a1d9862-910b-403e-9eab-697dc65618c7	6TH	T3	M0	STAGE IIB	N1	Pancreatic Cancer	PAAD	Pancreatic Adenocarcinoma	G1	8500/3	C25.0	PAAD	Primary	PAAD	Pancreas	Pancreas Adenocarcinoma, Ductal Type
paad_tcga_pan_can_atlas_2018	TCGA-IB-7646	TCGA-IB-7646-01	d1e0f479-77dd-42cd-89cb-c1eeac60c10a	6TH	T3	M0	STAGE IIB	N1	Pancreatic Cancer	PAAD	Pancreatic Adenocarcinoma	G2	8500/3	C25.0	PAAD	Primary	PAAD	Pancreas	Pancreas Adenocarcinoma, Ductal Type
paad_tcga_pan_can_atlas_2018	TCGA-IB-7647	TCGA-IB-7647-01	d14154a5-9c8a-4c55-8c2d-64f3cad7b7d5	6TH	T3	M0	STAGE IIB	N1	Pancreatic Cancer	PAAD	Pancreatic Adenocarcinoma	G2	8500/3	C25.0	PAAD	Primary	PAAD	Pancreas	Pancreas Adenocarcinoma, Ductal Type
paad_tcga_pan_can_atlas_2018	TCGA-IB-7649	TCGA-IB-7649-01	ec9ac713-08e9-4559-b606-5f58d2c4df50	6TH	T3	M0	STAGE IIB	N1	Pancreatic Cancer	PAAD	Pancreatic Adenocarcinoma	G2	8500/3	C25.0	PAAD	Primary	PAAD	Pancreas	Pancreas Adenocarcinoma, Ductal Type
paad_tcga_pan_can_atlas_2018	TCGA-IB-7651	TCGA-IB-7651-01	3559f697-8fec-4f36-962c-632272fe9c9c	6TH	T3	M0	STAGE IIB	N1	Pancreatic Cancer	PAAD	Pancreatic Adenocarcinoma	G2	8500/3	C25.0	PAAD	Primary	PAAD	Pancreas	Pancreas Adenocarcinoma, Ductal Type
paad_tcga_pan_can_atlas_2018	TCGA-IB-7652	TCGA-IB-7652-01	178e68c0-4cb8-4042-a942-5a159ec1e12b	7TH	T3	M0	STAGE IIB	N1	Pancreatic Cancer	PAAD	Pancreatic Adenocarcinoma	G2	8500/3	C25.9	PAAD	Primary	PAAD	Pancreas	Pancreas Adenocarcinoma, Ductal Type
paad_tcga_pan_can_atlas_2018	TCGA-IB-7885	TCGA-IB-7885-01	77e49007-3e44-4157-beae-8f7e94234c78	7TH	T3	M0	STAGE IIB	N1	Pancreatic Cancer	PAAD	Pancreatic Adenocarcinoma	G2	8500/3	C25.9	PAAD	Primary	PAAD	Pancreas	Pancreas Adenocarcinoma, Ductal Type
paad_tcga_pan_can_atlas_2018	TCGA-IB-7886	TCGA-IB-7886-01	f73dfd7f-e054-46ff-9485-e8d05afe2da6	7TH	T3	M0	STAGE IIB	N1	Pancreatic Cancer	PAAD	Pancreatic Adenocarcinoma	G3	8500/3	C25.9	PAAD	Primary	PAAD	Pancreas	Pancreas Adenocarcinoma, Ductal Type
paad_tcga_pan_can_atlas_2018	TCGA-IB-7887	TCGA-IB-7887-01	fe699c36-82ef-45dd-b636-8c18a9ef6c76	7TH	T3	M0	STAGE IIB	N1	Pancreatic Cancer	PAAD	Pancreatic Adenocarcinoma	G2	8500/3	C25.9	PAAD	Primary	PAAD	Pancreas	Pancreas Adenocarcinoma, Ductal Type
paad_tcga_pan_can_atlas_2018	TCGA-IB-7888	TCGA-IB-7888-01	05d2adb3-5c6d-4edc-ba4c-bdbf628f4eee	6TH	T3	M0	STAGE IIA	N0	Pancreatic Cancer	PAAD	Pancreatic Adenocarcinoma	G2	8500/3	C25.9	PAAD	Primary	PAAD	Pancreas	Pancreas Adenocarcinoma, Ductal Type
paad_tcga_pan_can_atlas_2018	TCGA-IB-7889	TCGA-IB-7889-01	31e66b80-c684-4ee8-82ae-36d00f36bc88	7TH	T3	M0	STAGE IIB	N1	Pancreatic Cancer	PAAD	Pancreatic Adenocarcinoma	G1	8500/3	C25.9	PAAD	Primary	PAAD	Pancreas	Pancreas Adenocarcinoma, Ductal Type
paad_tcga_pan_can_atlas_2018	TCGA-IB-7890	TCGA-IB-7890-01	5494af7d-403a-423b-b7ff-e6db9c117e93	6TH	T2	M0	STAGE IB	N0	Pancreatic Cancer	PAAD	Pancreatic Adenocarcinoma	G3	8500/3	C25.9	PAAD	Primary	PAAD	Pancreas	Pancreas Adenocarcinoma, Ductal Type
paad_tcga_pan_can_atlas_2018	TCGA-IB-7891	TCGA-IB-7891-01	ca2da39a-263c-4238-9826-de7d52e63d0f	7TH	T3	M0	STAGE IIB	N1	Pancreatic Cancer	PAAD	Pancreatic Adenocarcinoma	G1	8500/3	C25.9	PAAD	Primary	PAAD	Pancreas	Pancreas Adenocarcinoma, Ductal Type
paad_tcga_pan_can_atlas_2018	TCGA-IB-7893	TCGA-IB-7893-01	0944ce65-a89a-4916-b90a-f674b334281e	6TH	T3	M0	STAGE IIA	N0	Pancreatic Cancer	PAAD	Pancreatic Adenocarcinoma	G3	8500/3	C25.9	PAAD	Primary	PAAD	Pancreas	Pancreas Adenocarcinoma, Ductal Type
paad_tcga_pan_can_atlas_2018	TCGA-IB-7897	TCGA-IB-7897-01	01775b06-5836-469c-8537-120cb8cc94e9	6TH	T3	M0	STAGE IIB	N1	Pancreatic Cancer	PAAD	Pancreatic Adenocarcinoma	G2	8500/3	C25.9	PAAD	Primary	PAAD	Pancreas	Pancreas Adenocarcinoma, Ductal Type
paad_tcga_pan_can_atlas_2018	TCGA-IB-8126	TCGA-IB-8126-01	4387a2c2-8007-4735-a48c-34a2b476018e	7TH	T4	M0	STAGE III	N1	Pancreatic Cancer	PAAD	Pancreatic Adenocarcinoma	G1	8500/3	C25.0	PAAD	Primary	PAAD	Pancreas	Pancreas Adenocarcinoma, Ductal Type
paad_tcga_pan_can_atlas_2018	TCGA-IB-8127	TCGA-IB-8127-01	0b4443a0-087d-47e7-9e67-795eac6750c3	7TH	T3	M0	STAGE IIB	N1	Pancreatic Cancer	PAAD	Pancreatic Adenocarcinoma	G2	8500/3	C25.0	PAAD	Primary	PAAD	Pancreas	Pancreas Adenocarcinoma, Ductal Type
paad_tcga_pan_can_atlas_2018	TCGA-IB-A5SO	TCGA-IB-A5SO-01	C6388925-C0A1-4610-A6B9-D9D9500D88C6	7TH	T3	M0	STAGE IIB	N1	Pancreatic Cancer	PAAD	Pancreatic Adenocarcinoma	G2	8500/3	C25.0	PAAD	Primary	PAAD	Pancreas	Pancreas Adenocarcinoma, Ductal Type
paad_tcga_pan_can_atlas_2018	TCGA-IB-A5SP	TCGA-IB-A5SP-01	BD73ED94-5F4F-4EB3-8B9B-391AF4422D0E	7TH	T3	M0	STAGE IIA	N0	Pancreatic Cancer	PAAD	Pancreatic Adenocarcinoma	G2	8500/3	C25.0	PAAD	Primary	PAAD	Pancreas	Pancreas Adenocarcinoma, Ductal Type
paad_tcga_pan_can_atlas_2018	TCGA-IB-A5SQ	TCGA-IB-A5SQ-01	4F87E061-E773-48F2-84BA-32401396500E	7TH	T2	M0	STAGE IB	N0	Pancreatic Cancer	PAAD	Pancreatic Adenocarcinoma	G2	8500/3	C25.0	PAAD	Primary	PAAD	Pancreas	Pancreas Adenocarcinoma, Ductal Type
paad_tcga_pan_can_atlas_2018	TCGA-IB-A5SS	TCGA-IB-A5SS-01	31ACA8A3-7107-4B9D-8B6A-C07CAA2A9339	7TH	T3	M0	STAGE IIB	N1	Pancreatic Cancer	PAAD	Pancreatic Adenocarcinoma	G3	8500/3	C25.0	PAAD	Primary	PAAD	Pancreas	Pancreas Adenocarcinoma, Ductal Type
paad_tcga_pan_can_atlas_2018	TCGA-IB-A5ST	TCGA-IB-A5ST-01	6C0EA771-EA86-4DB6-994A-2372B2B8F536	7TH	T3	M0	STAGE IIB	N1	Pancreatic Cancer	PAAD	Pancreatic Adenocarcinoma	G2	8500/3	C25.0	PAAD	Primary	PAAD	Pancreas	Pancreas Adenocarcinoma, Ductal Type
paad_tcga_pan_can_atlas_2018	TCGA-IB-A6UF	TCGA-IB-A6UF-01	56A1B8FF-A71C-4E5F-9C3C-D8162FF896AA	7TH	T3	M0	STAGE IIB	N1	Pancreatic Cancer	PAAD	Pancreatic Adenocarcinoma	G2	8500/3	C25.0	PAAD	Primary	PAAD	Pancreas	Pancreas Adenocarcinoma, Ductal Type
paad_tcga_pan_can_atlas_2018	TCGA-IB-A6UG	TCGA-IB-A6UG-01	45E48080-0B27-45F4-8149-1AE7E36C6933	7TH	T3	M0	STAGE IIB	N1	Pancreatic Cancer	PAAD	Pancreatic Adenocarcinoma	G3	8500/3	C25.0	PAAD	Primary	PAAD	Pancreas	Pancreas Adenocarcinoma, Ductal Type
paad_tcga_pan_can_atlas_2018	TCGA-IB-A7LX	TCGA-IB-A7LX-01	712C2F78-C736-42CE-B689-A954C5290987	7TH	T3	MX	STAGE IIB	N1	Pancreatic Cancer	PAAD	Pancreatic Adenocarcinoma	G2	8500/3	C25.0	PAAD	Primary	PAAD	Pancreas	Pancreas Adenocarcinoma, Ductal Type
paad_tcga_pan_can_atlas_2018	TCGA-IB-A7M4	TCGA-IB-A7M4-01	6A0A280D-4A30-4071-AFE7-DE6B82A6E34C	7TH	T3	MX	STAGE IIB	N1	Pancreatic Cancer	PAAD	Pancreatic Adenocarcinoma	G3	8500/3	C25.1	PAAD	Primary	PAAD	Pancreas	Pancreas Adenocarcinoma, Ductal Type
paad_tcga_pan_can_atlas_2018	TCGA-IB-AAUM	TCGA-IB-AAUM-01	CFDA26B9-D417-425C-9A72-FA76CA4B296C	7TH	T2	M0	STAGE IIB	N1	Pancreatic Cancer	PAAD	Pancreatic Adenocarcinoma	G3	8500/3	C25.0	PAAD	Primary	PAAD	Pancreas	Pancreas Adenocarcinoma, Ductal Type
paad_tcga_pan_can_atlas_2018	TCGA-IB-AAUN	TCGA-IB-AAUN-01	638B1A6A-C222-414C-96BC-F259F0AFB278	7TH	T2	M0	STAGE IB	N0	Pancreatic Cancer	PAAD	Pancreatic Adenocarcinoma	G2	8500/3	C25.0	PAAD	Primary	PAAD	Pancreas	Pancreas Adenocarcinoma, Ductal Type
paad_tcga_pan_can_atlas_2018	TCGA-IB-AAUO	TCGA-IB-AAUO-01	869E61D6-FBBF-4CA2-BE1A-57B82A03C7A1	7TH	T3	M0	STAGE IIB	N1	Pancreatic Cancer	PAAD	Pancreatic Adenocarcinoma	G3	8500/3	C25.0	PAAD	Primary	PAAD	Pancreas	Pancreas Adenocarcinoma, Ductal Type
paad_tcga_pan_can_atlas_2018	TCGA-IB-AAUP	TCGA-IB-AAUP-01	0A3C8161-4186-4C95-8288-9928D6DB0355	7TH	T3	M0	STAGE IIB	N1	Pancreatic Cancer	PAAD	Pancreatic Adenocarcinoma	G2	8500/3	C25.0	PAAD	Primary	PAAD	Pancreas	Pancreas Adenocarcinoma, Ductal Type
paad_tcga_pan_can_atlas_2018	TCGA-IB-AAUQ	TCGA-IB-AAUQ-01	AFE89625-B355-454D-8C0B-B4161EDD69F8	7TH	T3	M0	STAGE IIB	N1	Pancreatic Cancer	PAAD	Pancreatic Adenocarcinoma	G2	8500/3	C25.2	PAAD	Primary	PAAD	Pancreas	Pancreas Adenocarcinoma, Ductal Type
paad_tcga_pan_can_atlas_2018	TCGA-IB-AAUR	TCGA-IB-AAUR-01	6788E0E5-B67F-4FE6-AABB-6D0430AE2D06	7TH	T3	M0	STAGE IIB	N1	Pancreatic Cancer	PAAD	Pancreatic Adenocarcinoma	G1	8500/3	C25.0	PAAD	Primary	PAAD	Pancreas	Pancreas Adenocarcinoma, Ductal Type
paad_tcga_pan_can_atlas_2018	TCGA-IB-AAUS	TCGA-IB-AAUS-01	69285F58-9B70-4262-ACC0-8CF3D47540C3	7TH	T3	M0	STAGE IIB	N1	Pancreatic Cancer	PAAD	Pancreatic Adenocarcinoma	G2	8500/3	C25.0	PAAD	Primary	PAAD	Pancreas	Pancreas Adenocarcinoma, Ductal Type
paad_tcga_pan_can_atlas_2018	TCGA-IB-AAUT	TCGA-IB-AAUT-01	88EAEBFC-D740-4CDC-88F5-DF5E08633E2D	7TH	T2	M0	STAGE IIB	N1	Pancreatic Cancer	PAAD	Pancreatic Adenocarcinoma	G1	8480/3	C25.0	PAAD	Primary	NA	Pancreas	Pancreas Carcinoma, Colloid (Mucinous Non-Cystic)
paad_tcga_pan_can_atlas_2018	TCGA-IB-AAUU	TCGA-IB-AAUU-01	A53C919A-4E08-46F1-AF3F-30B16B597C33	7TH	T3	M0	STAGE IIB	N1	Pancreatic Cancer	PAAD	Pancreatic Adenocarcinoma	G3	8500/3	C25.0	PAAD	Primary	PAAD	Pancreas	Pancreas Adenocarcinoma, Ductal Type
paad_tcga_pan_can_atlas_2018	TCGA-LB-A7SX	TCGA-LB-A7SX-01	5750A6ED-2516-456D-97D4-2F6486845ED8	7TH	T3	MX	STAGE IIB	N1	Pancreatic Cancer	PAAD	Pancreatic Adenocarcinoma	G2	8500/3	C25.0	PAAD	Primary	PAAD	Pancreas	Pancreas Adenocarcinoma, Ductal Type
paad_tcga_pan_can_atlas_2018	TCGA-LB-A8F3	TCGA-LB-A8F3-01	F852DE27-B600-44A4-AB30-D74108DFC2E9	7TH	T3	MX	STAGE IIA	N0	Pancreatic Cancer	PAAD	Pancreatic Adenocarcinoma	G1	8500/3	C25.0	PAAD	Primary	PAAD	Pancreas	Pancreas Adenocarcinoma, Ductal Type
paad_tcga_pan_can_atlas_2018	TCGA-LB-A9Q5	TCGA-LB-A9Q5-01	31C23E65-1F18-4F59-8A54-31FEBEDEF8A2	7TH	T3	MX	STAGE IIB	N1	Pancreatic Cancer	PAAD	Pancreatic Adenocarcinoma	G3	8500/3	C25.0	PAAD	Primary	PAAD	Pancreas	Pancreas Adenocarcinoma, Ductal Type
paad_tcga_pan_can_atlas_2018	TCGA-M8-A5N4	TCGA-M8-A5N4-01	F0A4944C-D6CF-4163-A1AB-189803464B03	6TH	T3	M0	STAGE IIA	N0	Pancreatic Cancer	PAAD	Pancreatic Adenocarcinoma	G2	8500/3	C25.0	PAAD	Primary	PAAD	Pancreas	Pancreas Adenocarcinoma, Ductal Type
paad_tcga_pan_can_atlas_2018	TCGA-OE-A75W	TCGA-OE-A75W-01	4A60E87E-6BC1-4AE0-9CCB-4CDC3E99C608	7TH	T3	M0	STAGE IIA	N0	Pancreatic Cancer	PAAD	Pancreatic Adenocarcinoma	G1	8500/3	C25.2	PAAD	Primary	PAAD	Pancreas	Pancreas Adenocarcinoma, Ductal Type
paad_tcga_pan_can_atlas_2018	TCGA-PZ-A5RE	TCGA-PZ-A5RE-01	C26002E7-ABF1-42B9-BF36-0E97249D872F	7TH	T3	MX	STAGE IIB	N1	Pancreatic Cancer	PAAD	Pancreatic Adenocarcinoma	G3	8500/3	C25.0	PAAD	Primary	PAAD	Pancreas	Pancreas Adenocarcinoma, Ductal Type
paad_tcga_pan_can_atlas_2018	TCGA-Q3-A5QY	TCGA-Q3-A5QY-01	1756244E-13BC-4ED7-8B91-005608803D91	7TH	T3	MX	STAGE IIB	N1	Pancreatic Cancer	PAAD	Pancreatic Adenocarcinoma	G2	8500/3	C25.0	PAAD	Primary	PAAD	Pancreas	Pancreas Adenocarcinoma, Ductal Type
paad_tcga_pan_can_atlas_2018	TCGA-Q3-AA2A	TCGA-Q3-AA2A-01	23908554-B98E-4FF8-98E7-DEE3E2C5FEAF	7TH	T3	MX	STAGE IB	N1	Pancreatic Cancer	PAAD	Pancreatic Adenocarcinoma	G1	8500/3	C25.0	PAAD	Primary	PAAD	Pancreas	Pancreas Adenocarcinoma, Ductal Type
paad_tcga_pan_can_atlas_2018	TCGA-RB-A7B8	TCGA-RB-A7B8-01	5BFE94ED-88B9-44CE-8BBD-1285AB9678A4	7TH	T3	MX	STAGE IIB	N1	Pancreatic Cancer	PAAD	Pancreatic Adenocarcinoma	G2	8255/3	C25.0	PAAD	Primary	PAAD	Pancreas	Pancreas Adenocarcinoma, Other Subtype
paad_tcga_pan_can_atlas_2018	TCGA-RB-AA9M	TCGA-RB-AA9M-01	9D5C5303-550F-454F-8FD4-8ABCDD311215	7TH	T1	MX	STAGE IIB	N1	Pancreatic Cancer	PAAD	Pancreatic Adenocarcinoma	G3	8500/3	C25.2	PAAD	Primary	PAAD	Pancreas	Pancreas Adenocarcinoma, Ductal Type
paad_tcga_pan_can_atlas_2018	TCGA-S4-A8RM	TCGA-S4-A8RM-01	C70621CC-C8E1-441D-93EC-BD6922CC7F61	7TH	T3	MX	STAGE IIB	N1	Pancreatic Cancer	PAAD	Pancreatic Adenocarcinoma	G3	8500/3	C25.9	PAAD	Primary	PAAD	Pancreas	Pancreas Adenocarcinoma, Ductal Type
paad_tcga_pan_can_atlas_2018	TCGA-S4-A8RO	TCGA-S4-A8RO-01	A9C0F3A1-01EB-4F01-B58A-708B2960E685	7TH	T3	MX	STAGE IIB	N1	Pancreatic Cancer	PAAD	Pancreatic Adenocarcinoma	G2	8500/3	C25.0	PAAD	Primary	PAAD	Pancreas	Pancreas Adenocarcinoma, Ductal Type
paad_tcga_pan_can_atlas_2018	TCGA-S4-A8RP	TCGA-S4-A8RP-01	CE2BFD9E-6382-47BB-9FD1-B77AFE57E948	7TH	T3	MX	STAGE IIB	N1	Pancreatic Cancer	PAAD	Pancreatic Adenocarcinoma	G3	8500/3	C25.0	PAAD	Primary	PAAD	Pancreas	Pancreas Adenocarcinoma, Ductal Type
paad_tcga_pan_can_atlas_2018	TCGA-US-A774	TCGA-US-A774-01	09FD6D9E-C715-4D57-88F9-238DD74C79A7	7TH	T3	MX	STAGE IIB	N1	Pancreatic Cancer	PAAD	Pancreatic Adenocarcinoma	G3	8500/3	C25.0	PAAD	Primary	PAAD	Pancreas	Pancreas Adenocarcinoma, Ductal Type
paad_tcga_pan_can_atlas_2018	TCGA-US-A776	TCGA-US-A776-01	D211E0C1-7968-4343-8AAE-27FAB0039367	7TH	T3	MX	STAGE IIA	N0	Pancreatic Cancer	PAAD	Pancreatic Adenocarcinoma	G2	8480/3	C25.0	PAAD	Primary	PAAD	Pancreas	Pancreas Carcinoma, Colloid (Mucinous Non-Cystic)
paad_tcga_pan_can_atlas_2018	TCGA-US-A779	TCGA-US-A779-01	53C94A86-1B4D-4833-A169-D990C460B301	7TH	T3	MX	STAGE IIB	N1B	Pancreatic Cancer	PAAD	Pancreatic Adenocarcinoma	G1	8500/3	C25.0	PAAD	Primary	PAAD	Pancreas	Pancreas Adenocarcinoma, Ductal Type
paad_tcga_pan_can_atlas_2018	TCGA-US-A77E	TCGA-US-A77E-01	5AA57FFF-4515-4076-8798-55015BB4F156	7TH	T3	MX	STAGE IIB	N1	Pancreatic Cancer	PAAD	Pancreatic Adenocarcinoma	G3	8140/3	C25.0	PAAD	Primary	PAAD	Pancreas	Pancreas Adenocarcinoma, Other Subtype
paad_tcga_pan_can_atlas_2018	TCGA-US-A77G	TCGA-US-A77G-01	74AA6675-28B7-46DC-9015-F07A07C7B018	7TH	T3	MX	STAGE IIB	N1	Pancreatic Cancer	PAAD	Pancreatic Adenocarcinoma	G2	8500/3	C25.0	PAAD	Primary	PAAD	Pancreas	Pancreas Adenocarcinoma, Ductal Type
paad_tcga_pan_can_atlas_2018	TCGA-XD-AAUG	TCGA-XD-AAUG-01	F89D429F-4747-468B-B894-89583BD8AB02	7TH	T3	M1	STAGE IV	N1	Pancreatic Cancer	PAAD	Pancreatic Adenocarcinoma	G2	8500/3	C25.1	PAAD	Primary	PAAD	Pancreas	Pancreas Adenocarcinoma, Ductal Type
paad_tcga_pan_can_atlas_2018	TCGA-XD-AAUH	TCGA-XD-AAUH-01	B46B5A4C-59FC-4769-B05A-D15F9AAA753A	7TH	T3	M0	STAGE IIB	N1	Pancreatic Cancer	PAAD	Pancreatic Adenocarcinoma	G2	8500/3	C25.0	PAAD	Primary	PAAD	Pancreas	Pancreas Adenocarcinoma, Ductal Type
paad_tcga_pan_can_atlas_2018	TCGA-XD-AAUI	TCGA-XD-AAUI-01	9A2DB69E-D429-45D4-89CA-A2C4E0CFC116	7TH	T3	MX	STAGE IIB	N1	Pancreatic Cancer	PAAD	Pancreatic Adenocarcinoma	G2	8500/3	C25.0	PAAD	Primary	PAAD	Pancreas	Pancreas Adenocarcinoma, Ductal Type
paad_tcga_pan_can_atlas_2018	TCGA-XD-AAUL	TCGA-XD-AAUL-01	597A5A56-244B-4218-A55D-5D08217EA28C	7TH	T3	MX	STAGE IIA	N0	Pancreatic Cancer	PAAD	Pancreatic Adenocarcinoma	G2	8500/3	C25.0	PAAD	Primary	PAAD	Pancreas	Pancreas Adenocarcinoma, Ductal Type
paad_tcga_pan_can_atlas_2018	TCGA-XN-A8T3	TCGA-XN-A8T3-01	DD7BCDD8-1660-4DAB-9860-9D136C4CEE77	7TH	T2	M0	STAGE IB	N0	Pancreatic Cancer	PAAD	Pancreatic Adenocarcinoma	G2	8500/3	C25.0	PAAD	Primary	PAAD	Pancreas	Pancreas Adenocarcinoma, Ductal Type
paad_tcga_pan_can_atlas_2018	TCGA-XN-A8T5	TCGA-XN-A8T5-01	382B279F-87E1-4DBC-A2CA-C1DFDE1CF254	7TH	T2	M0	STAGE IB	N0	Pancreatic Cancer	PAAD	Pancreatic Adenocarcinoma	G2	8500/3	C25.0	PAAD	Primary	PAAD	Pancreas	Pancreas Adenocarcinoma, Other Subtype
paad_tcga_pan_can_atlas_2018	TCGA-YB-A89D	TCGA-YB-A89D-01	B84B58C7-95B8-4162-8E61-414F8FE422C6	7TH	T3	MX	STAGE IIB	N1	Pancreatic Cancer	PAAD	Pancreatic Adenocarcinoma	G2	8500/3	C25.1	PAAD	Primary	PAAD	Pancreas	Pancreas Adenocarcinoma, Ductal Type
paad_tcga_pan_can_atlas_2018	TCGA-YH-A8SY	TCGA-YH-A8SY-01	503D7E36-DF78-428D-9971-09FF707645C2	7TH	T3	MX	STAGE III	N1	Pancreatic Cancer	PAAD	Pancreatic Adenocarcinoma	G2	8140/3	C25.0	PAAD	Primary	PAAD	Pancreas	Pancreatic Adenocarcinoma
paad_tcga_pan_can_atlas_2018	TCGA-YY-A8LH	TCGA-YY-A8LH-01	EDE2E8A7-465E-4725-880D-519899ABA0C0	6TH	T3	MX	STAGE IIB	N1	Pancreatic Cancer	PAAD	Pancreatic Adenocarcinoma	G3	8500/3	C25.0	PAAD	Primary	PAAD	Pancreas	Pancreas Adenocarcinoma, Ductal Type
paad_tcga_pan_can_atlas_2018	TCGA-Z5-AAPL	TCGA-Z5-AAPL-01	6A4E10B6-E6C4-4210-AE4D-0D8E8D0CB3EC	7TH	T3	M0	STAGE IIA	N0	Pancreatic Cancer	PAAD	Pancreatic Adenocarcinoma	G1	8500/3	C25.9	PAAD	Primary	PAAD	Pancreas	Pancreas Adenocarcinoma, Ductal Type
